# Supplementary material for: Quantification of multiple steroid hormones in serum and human breast cancer tissue by liquid chromatography-tandem mass spectrometry analysis
Source: Front Oncol. 2024 May 28;14:1383104. doi: 10.3389/fonc.2024.1383104 (PMC11165045; doi:10.3389/fonc.2024.1383104)
Supplement: Supplementary file 2 [file Table_1.xlsx]

## Sheet: ST1. Comparison
Supplemental Table 1. The comparison of published MS-methods and the current method
Method	Steroid	Tissue type	Tissue amount	Sample preparation	Limit of quantification	Reference
LC-MS/MS	E1, E2, E, CORT, A4, and T	Breast cancer tissue	20~30 mg	LLE and Sephadex LH-20 chromatography	0.75, 1.25, 500, 250, 7.5, and 7.5 pg per sample for E1, E2, E, CORT, A4, and T.	The current manuscript
LC-MS/MS	E1, E2, F, and E	Breast adipose tissue	~200 mg	LLE, solid phase extraction on C18 Sep-Pak columns, and derivatization	15, 25, 75, and 100 pg per sample for E1, E2, E, and F.	Laforest et al. (2019, Ref 7)
LC-MS/MS	E1	Breast adipose tissue	~200 mg	LLE and Sephadex LH-20 chromatography	0.019 pg/mg for E1	Vihma et al. (2016, Ref 8)
LC-MS/MS	E2 and E2 fatty acyl esters	Breast adipose tissue	~200 mg	LLE and Sephadex LH-20 chromatography	0.019 pg/mg for E2	Wang et al. (2012, Ref 9)
GC-APCI-MS/MS	31 steroid hormones and metabolites	Breast adipose tissue	200-400 mg	LLE, gel permeation chromatography and derivatization	0.05 to 0.1 ng/g lipids for estrogens, and 0.5 to 10 ng/g lipids for progestagens and androgens.	Hennig et al. (2018, Ref 5)
GC-MS/MS	23 steroids	Breast cancer tissue	100 µm-thick *3 slices	LLE and derivatization	180 fg, 0.5 or 1 pg on column	Moon et al. (2018, Ref 6)
LC-MS/MS	E1, E2, A4, T, DHEA, DHEAS	Breast cancer tissue	No discription	No discription	No discription	Kakugawa et al. (2017, Ref 3)
LC-MS/MS	E1, E2, A4, DHEA, androstene-3β,17β-diol, and 5α-androstane-3β,17β-diol	Breast cancer tissue	40-200 mg	LLE, Bond C18 cartridge column, and anion-exchange sorbent cartridges	0.5, 0.1, and 5 pg per assay for E1, E2, and A4.	Honma et al. (2011, Ref 10)
LC-MS/MS	E2, DHT, A4, and T	Breast cancer tissue	~100 mg	LLE and derivatization	0.5, 1, and 1 pg for E2, A4, and T.	Takagi et al. (2010, Ref 11)
LC-MS/MS	E2 and DHT	Breast cancer tissue	32-89 mg	LLE, derivatization, and Bond Elut C18 column.	0.2 pg for E2	Shibuya et al. (2008, Ref 12)
LC-MS/MS	101 steroids and estrogen-related compounds	Breast cancer tissue	50 mg	LLE	2.5 pg for E1 and E2, A4, 2.5 pg for T, 24.7 pg for F, and 24.9 pg for B.	Gaikwad et al. (2013, Ref 13)
Capillary LC-MS/MS	Total and uncojugated levels of E1, E2, E3, T, and four estrogen metabolites.	Fresh frozen lymph node tissue infiltrated by metastatic breast carcinoma	Ten 8-µm-thick adjacent tissue sections	LLE and dansylation	0.4 pg for E1, E2, and T	Blonder et al. (2008, Ref 14)
LC-MS/MS	E1, E2, A4, T, DHEA, F, E, CORT, P4, and other 5 steroids	Endometrium and endometriotic tissue	15 mg	LLE and solid-phase extraction on an Oasis HLB extraction cartridge	0.4, 1.8, 1.9. 3.7, 12.0, 4.7, 11.4 pg/ml for E1, E2, T, A4, F, E and B.	Häkkinen et al. (2018, Ref 15)
LLE, liquid liquid extraction. DHEA, dehydroepiandrosterone. DHEAS, dehydroepiandrosterone-sulfate. DHT, dihydrotestosterone

## Sheet: ST2. Calibrators and OCs
Supplemental Table 2. Concentrations of calibrators, QCs, and LLOQs
Steroid hormones	Calibrator 1	Calibrator 2	Calibrator 3	Calibrator 4	Calibrator 5	Calibrator 6	Calibrator 7	Calibrator 8	LLOQs	QC 1	QC 2	QC 3	IS	Calibration curve
	ng/ml	ng/ml	ng/ml	ng/ml	ng/ml	ng/ml	ng/ml	ng/ml	ng/ml	ng/ml	ng/ml	ng/ml	ng/ml	Regression
E2	0.005	0.01	0.02	0.05	0.1	0.2	0.3	0.4	0.005	0.01	0.2	0.3	2.5	Linear (1/x)
E1	0.005	0.01	0.02	0.05	0.1	0.2	0.3	0.4	0.003	0.01	0.2	0.3	0.8	Linear (1/x)
F*	10	20	50	100	200	300	400	500	2.5	25	250	400	512	Quadratic (1/x)
E*	2	4	6	10	20	30	40	50	0.2	5	25	40	216	Linear (1/x)
CORT***	0.25#	0.5#	1	5	10	20	40	60	0.4#	1.5	30	45	216	Linear (1/x)
17OHP**	0.03#	0.05	0.1	0.5	1	2	3	5	0.04	0.15	2.5	4	27	Linear (1/x)
A4	0.05	0.1	0.2	0.5	1	2	3	5	0.03	0.1	2.5	4	6.4	Quadratic (1/x)
T	0.05	0.1	0.2	0.3	0.6	1	2	2.5	0.03	0.1	1.56	2	6.4	Quadratic (1/x)
P4	0.02	0.05	0.1	0.5	1	2	3	5	0.02	0.05	2.5	4	6.4	Quadratic (1/x)
QCs, quality control samples.
LLOQs, samples for lower limits of quantification
IS, internal standard.
The lower limit of quantification (LLOQ) for steroid hormones should be determined based on the concentrations measured in six replicate samples (LLOQs) in each of the three validation assays. However,four steroid hormones were either not detectable in LLOQs (CORT and 17OHP) or their accuracies were low (F and E).
*, accuracies were low in LLOQs and the concentrations in the calibrator 1 were used as their lower limit of quantification (LLOQ).
**, not detecatle in LLOQs and the concentration in the calibrator 2 was used as LLOQ.
***, not detectable in LLOQs and the concentration in the calibrator 3 was used as LLOQ.
#, not detectable.

## Sheet: ST3. Ion transitions
Supplemental Table 3. The ion transitions and LC-MS/MS parameters
Steroid	Molecular weight	Ion source mode	Transition	Cone voltage (V)	Collision energy (V)
E2*	272.38	Neg	271.4>145.0	-100	-56
d4_E2	276.41	Neg	275.5>147.0	-65	-56
E1*	270.366	Neg	269.4>145.0	-100	-47
d4_E1	274.39	Neg	273.5>147.1	-100	-52
F*	362.48	Neg	329.4>231.0	-180	-34
d4_F	366.48	Neg	333.4>305.1	-180	-36
E*	360.45	Neg	327.4>312.0	-160	-23
d8_E	368.49	Neg	332.4>317.0	-160	-23
CORT*	346.467	Neg	345.3>241.0	-100	-24
d8_CORT	354.51	Neg	352.5>245.1	-125	-26
17OHP*	330.46	Neg	329.4>285.2	-130	-23
d8_17OHP	338.51	Neg	337.5>290.1	-130	-23
A4	286.415	Pos	287.4>97.1	146	35
A4 (Qualifier)	286.415	Pos	287.4>109.1	146	35
d7_A4	293.5	Pos	294.6>100.1	121	30
T	288.431	Pos	289.4>97.1	100	42
T (Qualifier)	288.431	Pos	289.4>109.1	100	33
d3_T	291.4	Pos	292.6>97.0	51	30
P4	314.469	Pos	315.4>97.1	100	30
P4 (Qualifier)	314.469	Pos	315.4>109.1	100	32
d9_P4	323.5	Pos	324.7>113.1	126	35
* During the method development phase, the qualifier ions of these steroids were analyzed with the following ion trasitions:
E2: 271.2>183.2; E1: 269.2>183.2; F: 329.0.0>301.0; E: 327.0>299.0; CORT: 345.0>123.0; 17OHP: 329.4>301.4.

## Sheet: ST4 Serum method
Supplemental Table 4. The accuracy and reproducibility of the serum method
Steroid	Samples	Concentration ng/ml	Accuracy (%) mean (± SD) #	Intra-assay CV % mean (± SD) #	Inter-assay CV % #
E2	LLOQs	0.005	106.5 (±14.0)	8.5 (±1.1)	13.1
	QC 1	0.01	109.7 (±6.5)	7.6 (±6.8)	6.6
	QC 2	0.2	107.4 (±2.9)	8.5 (±2.6)	1.7
	QC 3	0.3	105.5 (±0.9)	8.0 (±2.3)	1.5
E1	LLOQs	0.003	109.5 (±2.4)	4.3 (±0.1)	2.2
	QC 1	0.01	109.1 (±3.4)	3.4 (±1.7)	3.1
	QC 2	0.2	107.6 (±3.5)	3.3 (±0.0)	3.4
	QC 3	0.3	107.7 (±5.3)	4.5 (±1.2)	1.9
F	LLOQs*	2	129 (±68.8)	8.1 (±6.0)	53.3
	QC 1	25	98.4 (±10.2)	15.4 (±3.5)	10.4
	QC 2	250	108.7 (±8.5)	8.1 (±2.7)	7.6
	QC 3	400	107.5 (±3.7)	6.9 (±1.3)	1.9
E	LLOQs*	0.2	197 (±118.2)	7.9 (±3.5)	60
	QC 1	5	107.9 (±1.6)	7.3 (±1.0)	1.5
	QC 2	25	101.8 (±4.0)	8.7 (±2.0)	2.7
	QC 3	40	105.8 (±8.7)	11.7 (±1.0)	1.3
CORT	LLOQs***	0.4	N.D. ##	N.D. ##	N.D. ##
	QC 1	1.5	113.4 (±4.4)	11.3 (±4.8)	3.8
	QC 2	30	104.9 (±3.8)	4.5 (±0.0)	0.9
	QC 3	45	107.5 (±2.7)	2.3 (±0.7)	0.9
17OHP	LLOQs**	0.04	110.6 (±2.5)	10.5 (±14.5)	9
	QC 1	0.15	110.2 (±1.2)	7.3 (±0.8)	1.1
	QC 2	2.5	104.2 (±4.4)	4.5 (±0.3)	3.8
	QC 3	4	107.7 (±4.2)	3.8 (±0.6)	5
A4	LLOQs	0.025	109.0 (±6.5)	3.2 (±0.2)	5.8
	QC 1	0.1	111.7 (±4.3)	3.4 (±0.8)	4.9
	QC 2	2.5	105.0 (±0.5)	3.5 (±1.0)	2.3
	QC 3	4	100.2 (±2.3)	2.7 (±1.1)	5.3
T	LLOQ	0.025	115.5 (±2.7)	2.0 (±0.0)	2.3
	QC 1	0.1	125.7 (±12.5)	6.6 (±1.1)	2.6
	QC 2	1.56	101.4 (±0.3)	3.8 (±2.2)	6.5
	QC 3	2	100.3 (±3.6)	3.9 (±0.6)	10.6
P4	LLOQs	0.03	102.6 (±14.7)	3.6 (±0.6)	14.3
	QC 1	0.05	109.6 (±6.2)	4.5 (±1.2)	3
	QC 2	2.5	109.3 (±3.3)	4.2 (±2.3)	3.3
	QC 3	4	106.4 (±1.9)	2.7 (±0.7)	1.5
QC, quality control. LLOQs, samples for lower limit of quantification. #, Three assays, n=5 for one assay, and n=6 for two assays. ##, not detectable. Since four steroid hormones (F, E, 17OHP, and CORT) in their LLOQs were not able to be accurately measured, the concentrations in the calibrator 1 (*), 2 (**), and 3 (***) were used as their corresponding LLOQ.

## Sheet: ST5 Tissue method
Supplemental Table 5. The analytical recovery of the tissue method
Steroid	Concentration	Recovery, %	Intra assay CV %	Inter assay CV %**
(LLOQ), pg/mg*	pg/mg*	mean (±SD) **	mean (±SD) **
E2 (0.063)	1.25	84.7 (±3.4)	3.5 (±0.3)	4
E1 (0.038)	1.25	88.3 (±8.3)	3.6 (±1.5)	9.4
F (125)	1250	145.5 (±12.2)	4.0 (±1.6)	8.4
E (25)	62.5	90.6 (±12.5)	7.7 (±8.3)	13.8
CORT (6.250)	125	87.0 (±14.2)	3.0 (±3.8)	16.3
A4 (0.375)	2.5	96.5 (±16.4)	3.9 (±3.4)	17
T (0.375)	2.5	96.7 (±10.6)	3.3 (±1.2)	11
P4 (0.375)	1.25	64.9 (±3.5)	9.1 (±4.8)	5.3
*, the concentrations were expressed as pg/mg, which were calculated using 20 mg of the tissue weight.
**, three assays, n=3 per assay. For P4, two assays and n=3 per assay.
Breast cancer tissue from anonymous donors were obtained from Biobank 1 (a jointed project by Norwegian University of Science and Technology, Trondheim, Norway, and the Mid-Norway Regional Health Authority, Norway).
